# Supplementary material
Source: publisher site journal article supplement (https://www.dovepress.com/article/556295)
Supplement: Supplementary file 1 [file 556295%20Supplementary%20Material.docx]

**CoFe₂O₄-Based Multifunctional Nanozymes Remodel Tumor Redox Balance for Enhanced Osteosarcoma Treatment**

Yang Yang1,2,#, Hongmei Gu3,#, Shuhen Qin4,#, Jiajia Liu2, Jianhua Xue2, Yong Hu4, Qiang Xue3,*, Xianchen Liu3,*

1Department of Emergency Medicine, Affiliated Hospital of Nantong University, Nantong City, Jiangsu Province,226001, China.

2Department of Chemistry, School of Science, China Pharmaceutical University.

Nanjing City, Jiangsu Province, 226001, China.

3Department of Radiation Oncology, Affiliated Hospital of Nantong University, Nantong City, Jiangsu Province,226001, China.

4College of Engineering and Applied Sciences, Nanjing University, Nanjing 210023, China

***Corresponding authors.**

E-mail addresses: Xianchen Liu (xianchenliunt@sina.com), Qiang Xue (ntxueqiang@163.com).

#These authors contributed equally to the work

**Figure S1.** The size changes of CF@P stored in PBS 7.4 buffer for different periods of time.


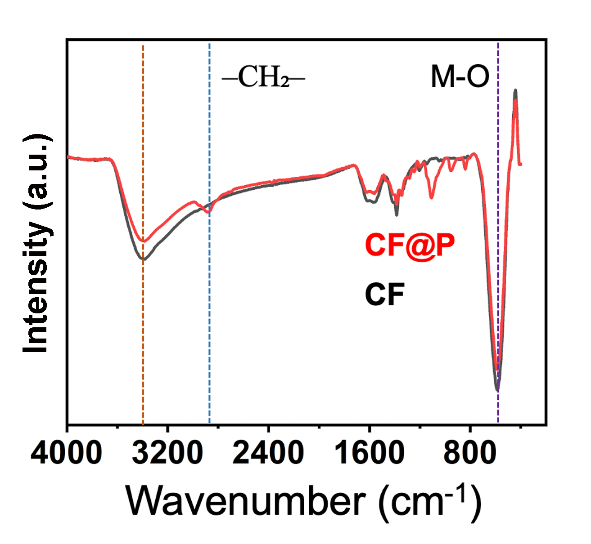


**Figure S2.** Infrared spectra of PEG and CF@P.


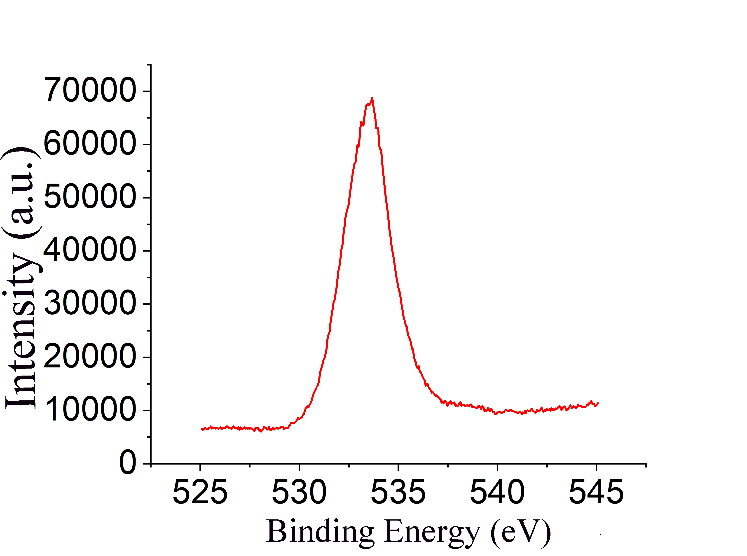


**Figure S3.** Core level XPS spectrum of O1s in CF@P.

**Figure S4.** Ultraviolet absorption spectra of CF@P nanozymes at different concentrations.


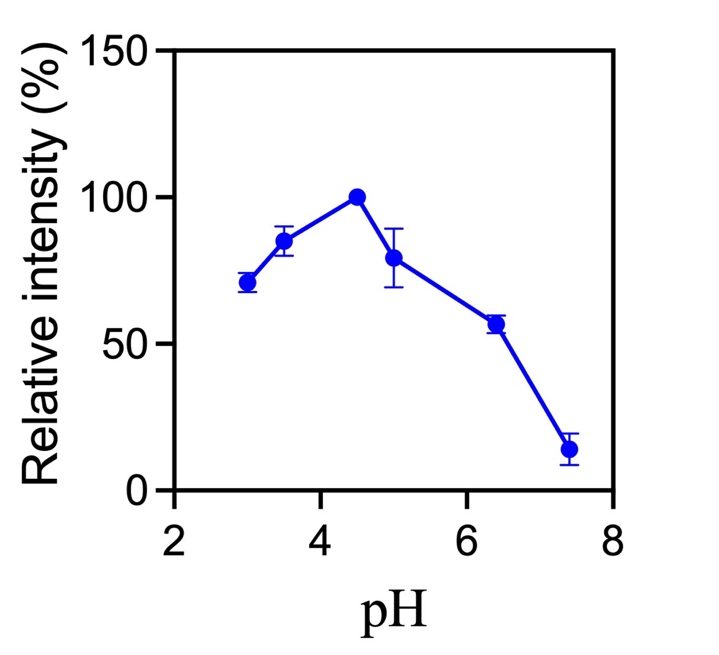


**Figure S5.** Effect of pH on the POD-like activity. Reaction conditions: 25℃, 100 μg mL-1 material, 0.25 mg mL-1 TMB.


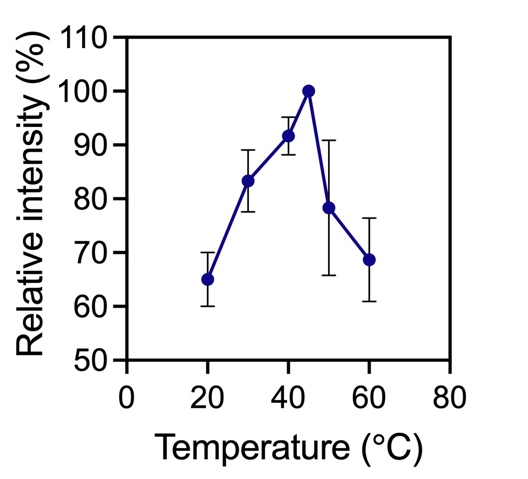


**Figure S6.** Effect of temperature on the POD-like activity. Reaction conditions: pH 4.5, 100 μg mL-1 material, 0.25 mg mL-1 TMB.

**Figure S7.** UV–vis absorption spectra of 1, 10-phenanthroline solution treated with CF@P and glutathione under different reaction times, (pH 4.5 buffer).

**Figure S8.** Intracellular GSH level of U2OS cells after different treatments, CF@P: 0.1 mg/ml; NIR: 1.32 W/cm2, 1064 nm,10min. ***p < 0.001


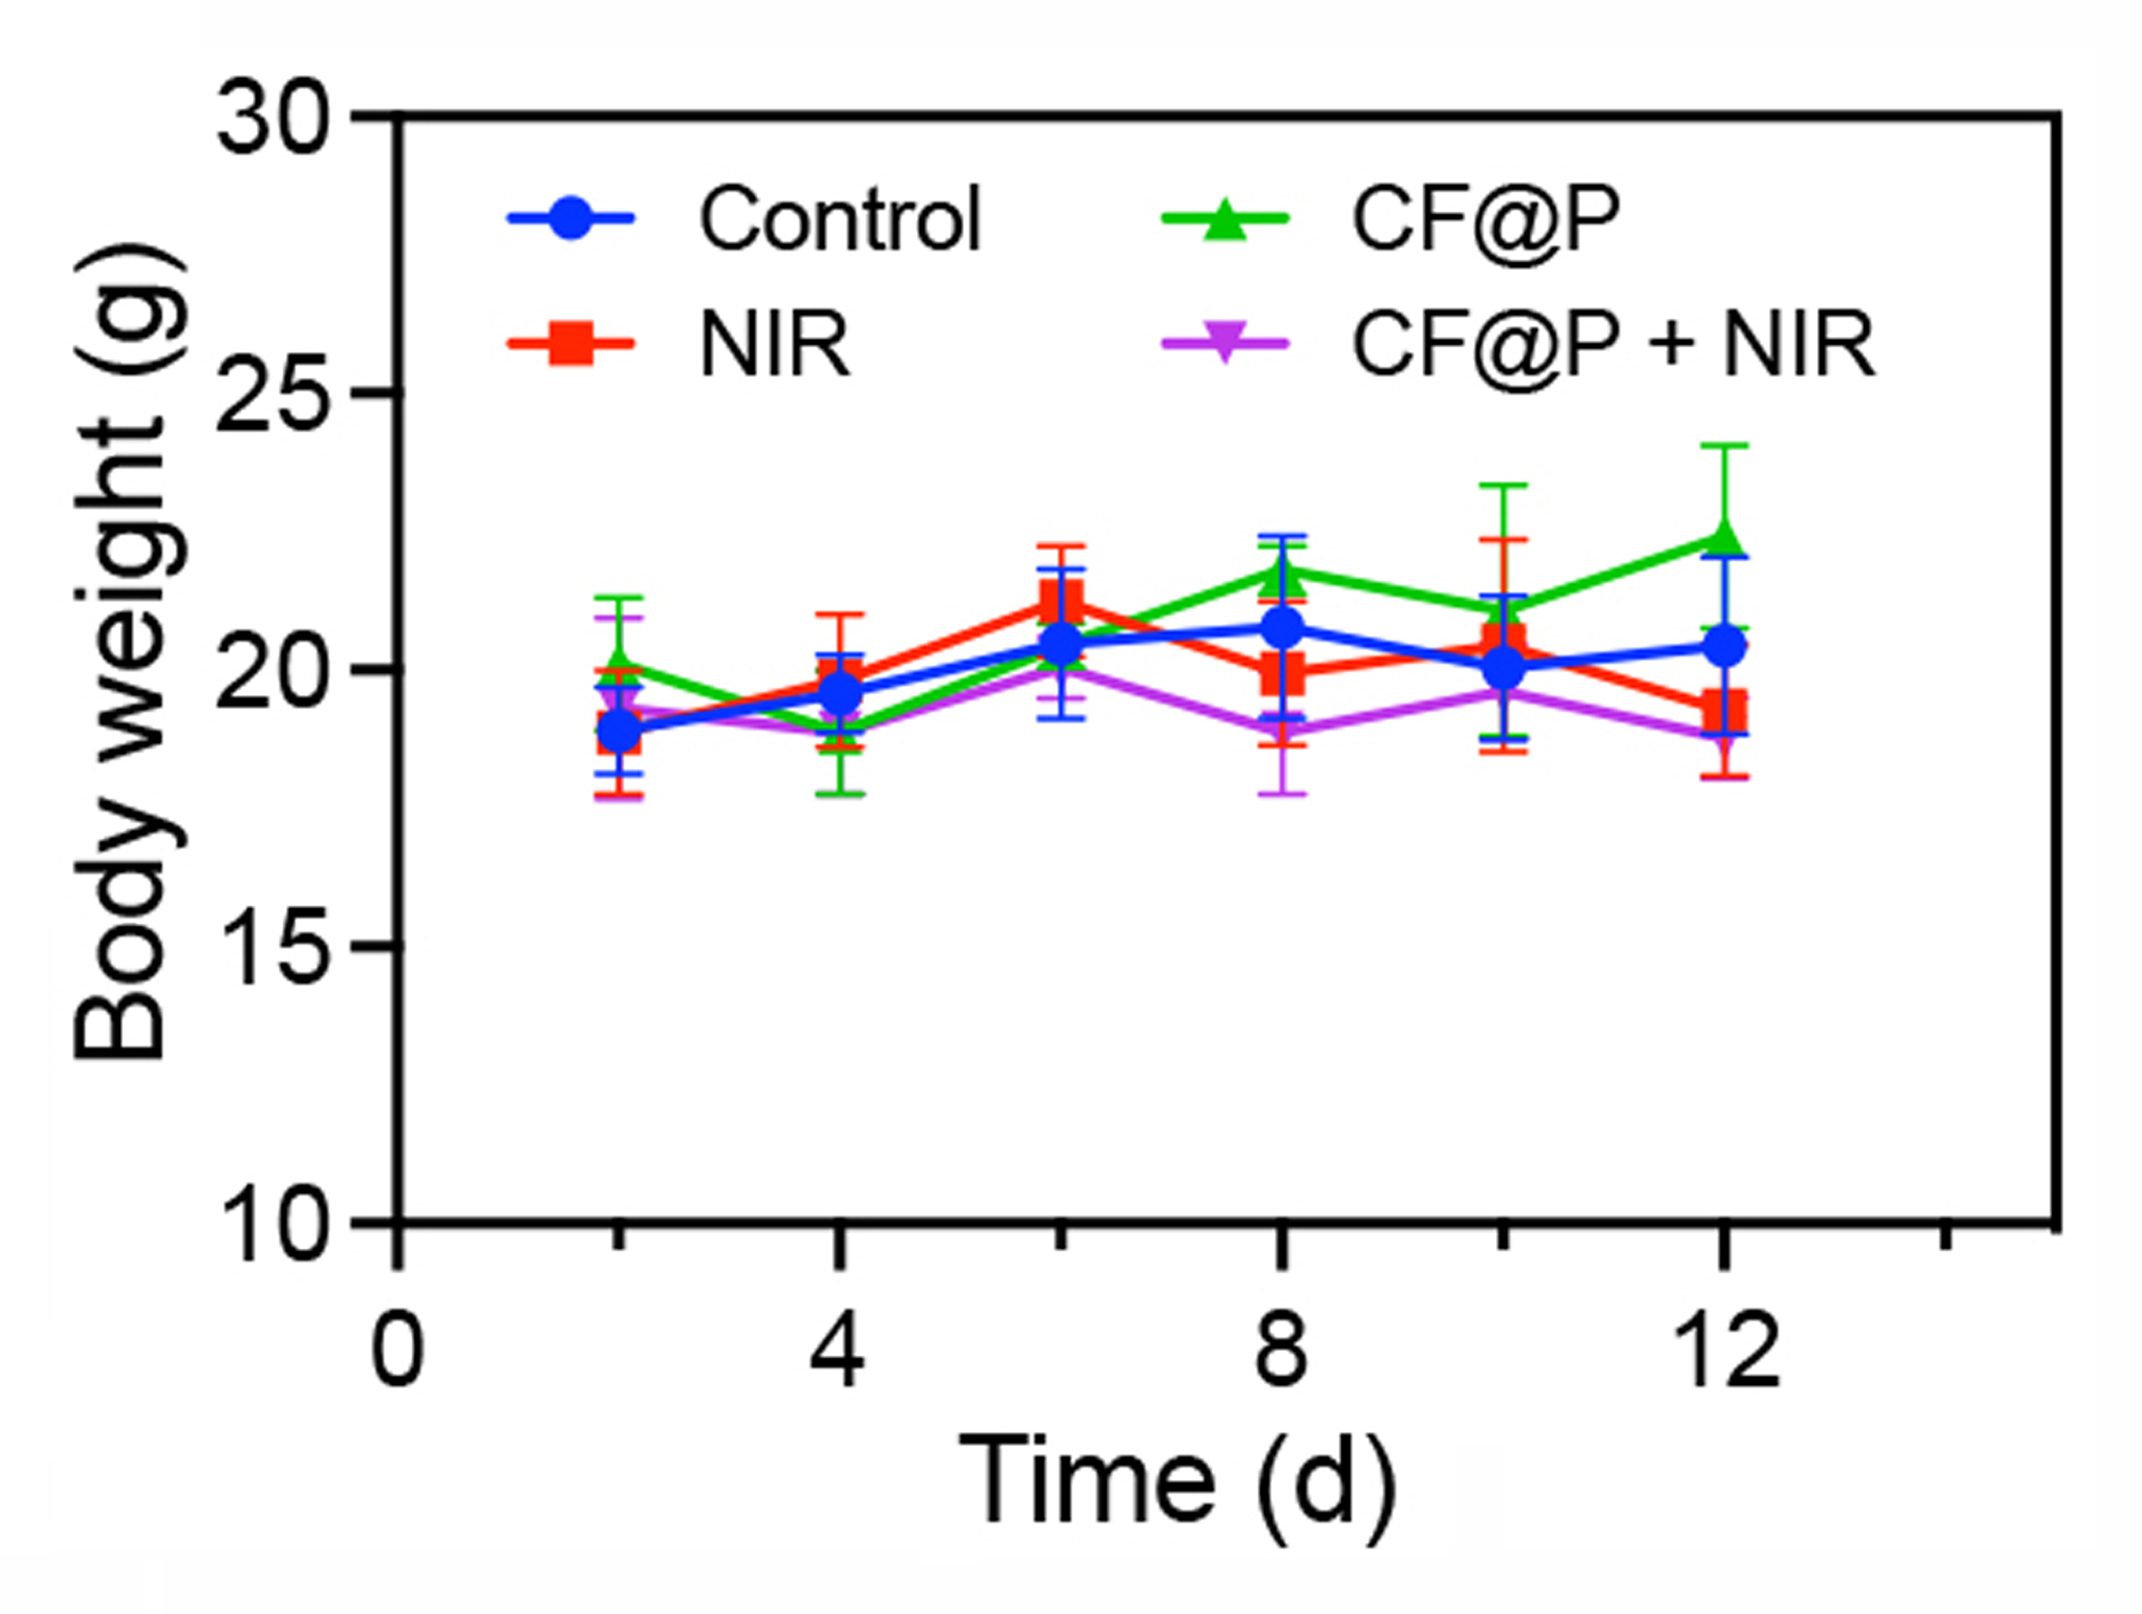


**Figure S9.** Body weights of the mice in various treatment groups.
